# Supplementary figures and images for: Quercetin ameliorates cyclophosphamide-induced premature ovarian insufficiency by modulating SIRT1/HIF-1α pathway
Source: Research Square preprint supplement (doi:10.21203/rs.3.rs-6972937/v1), 2025-07-15

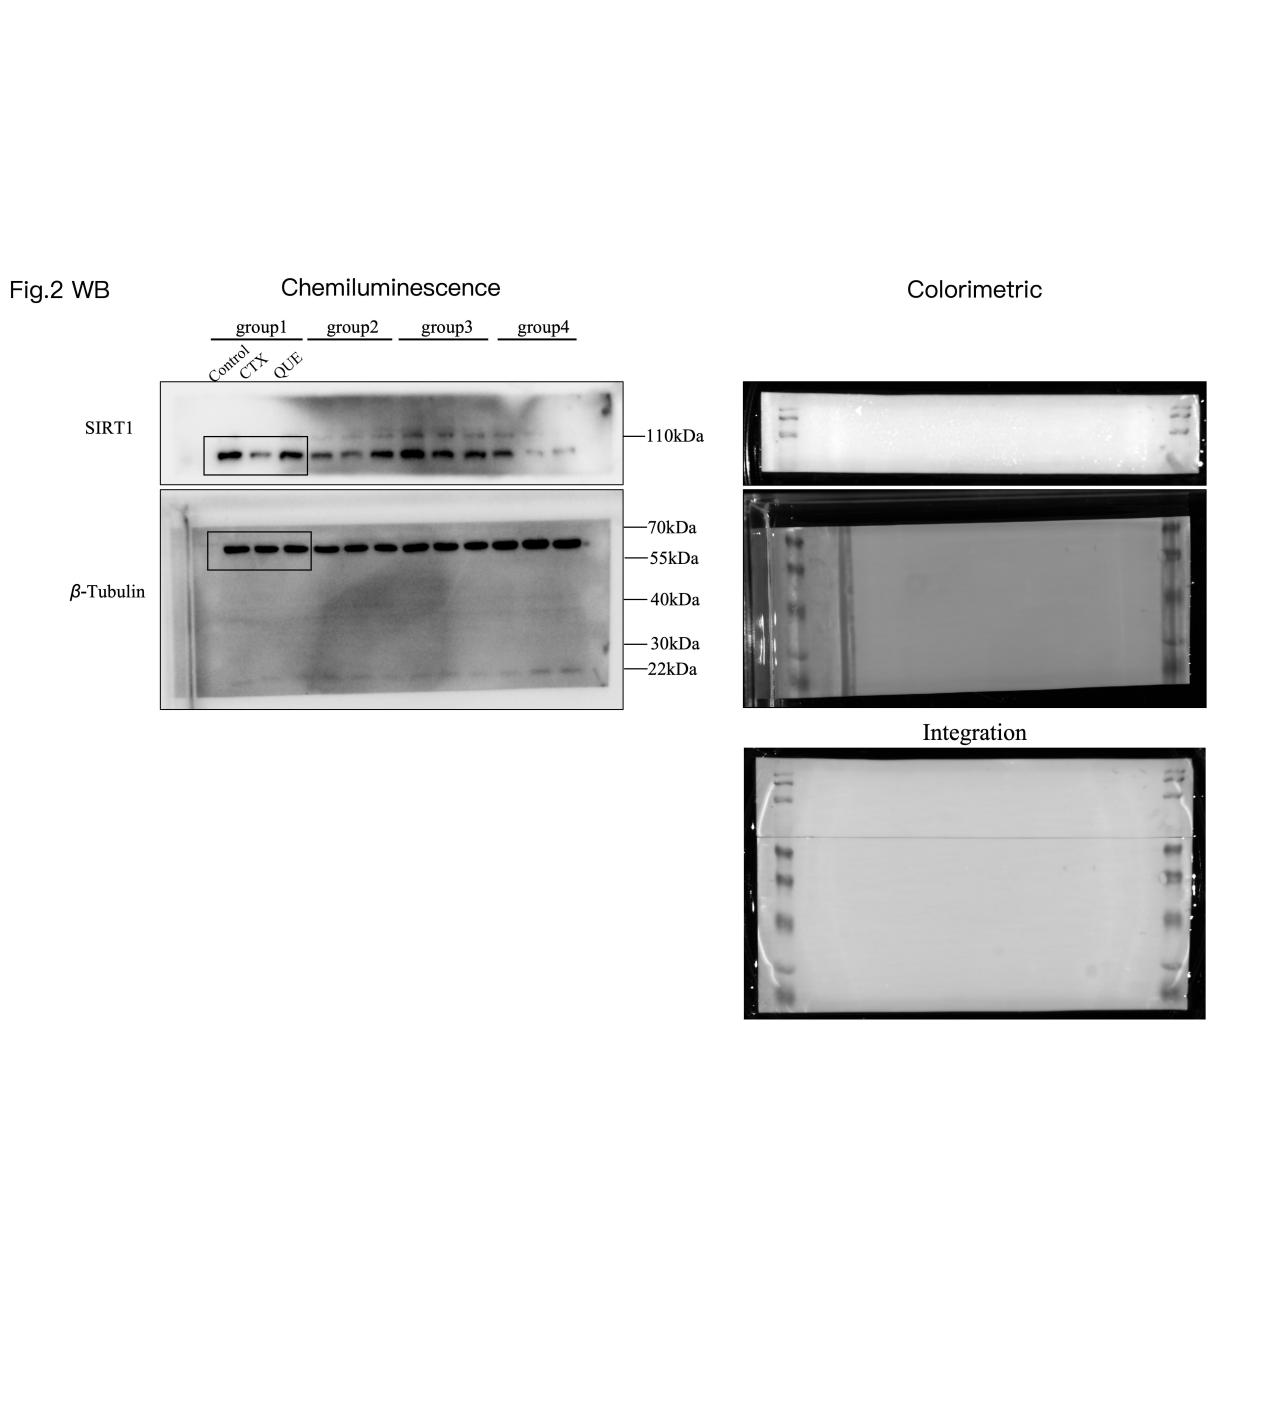


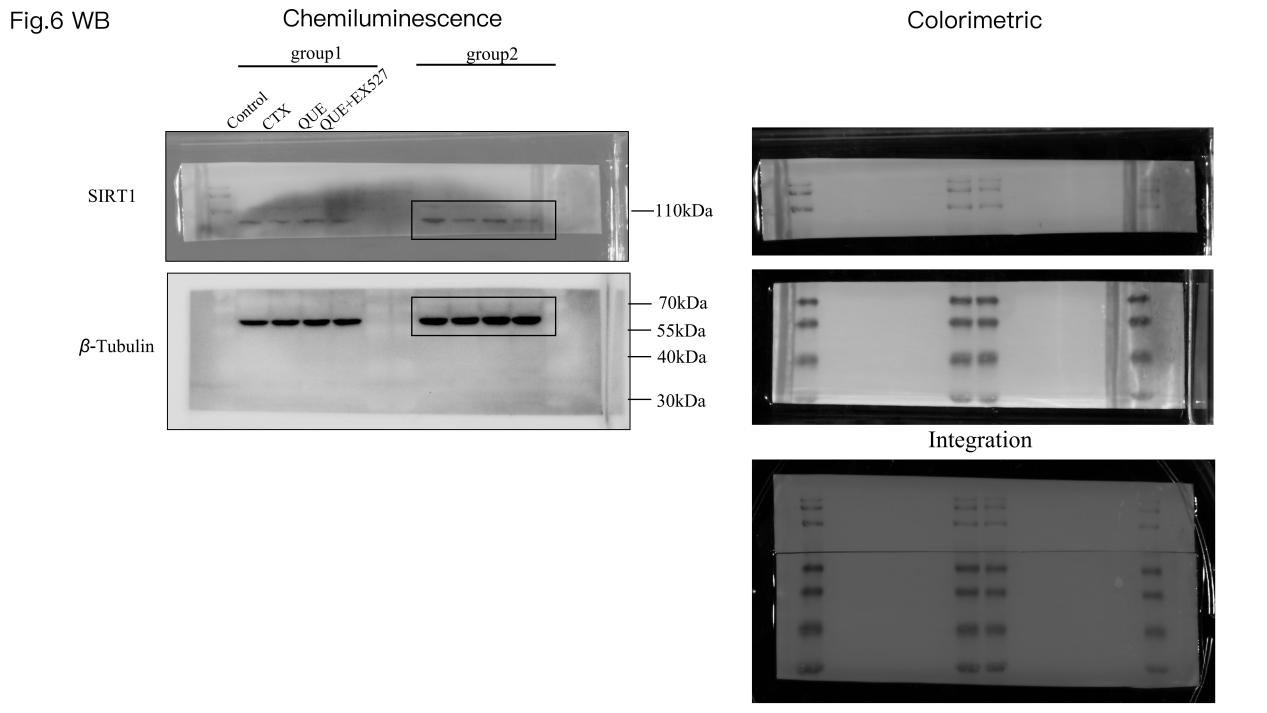


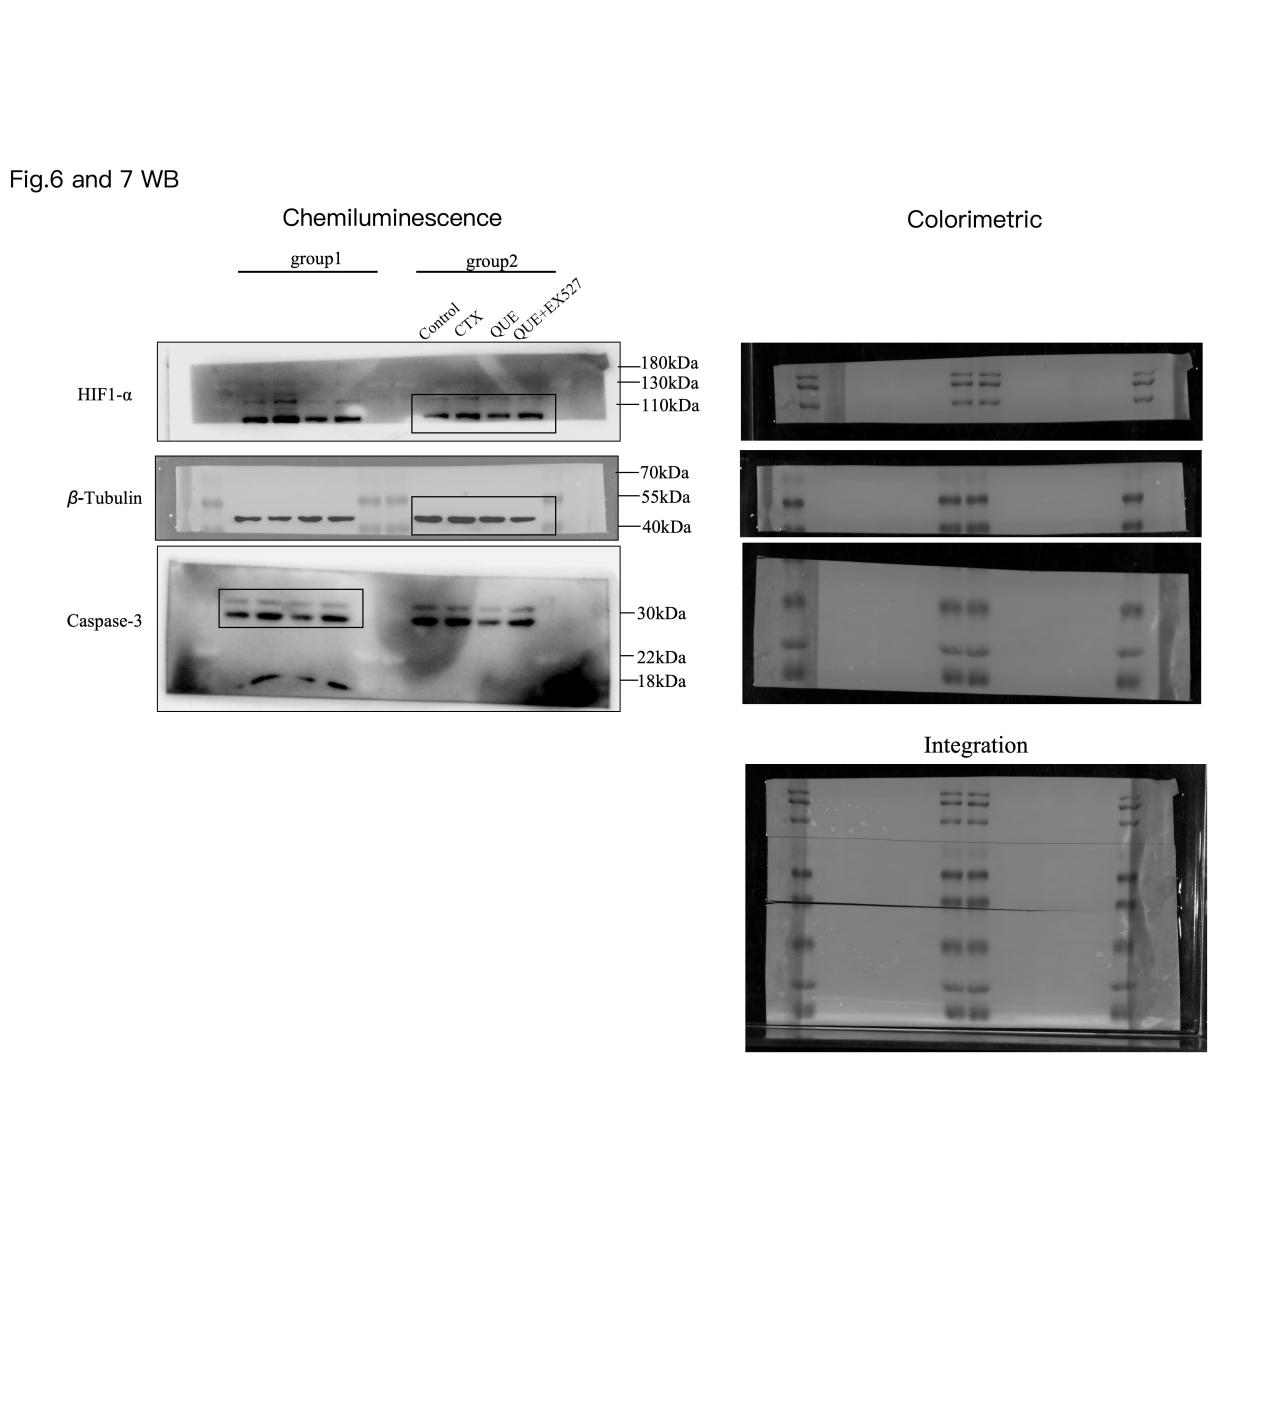


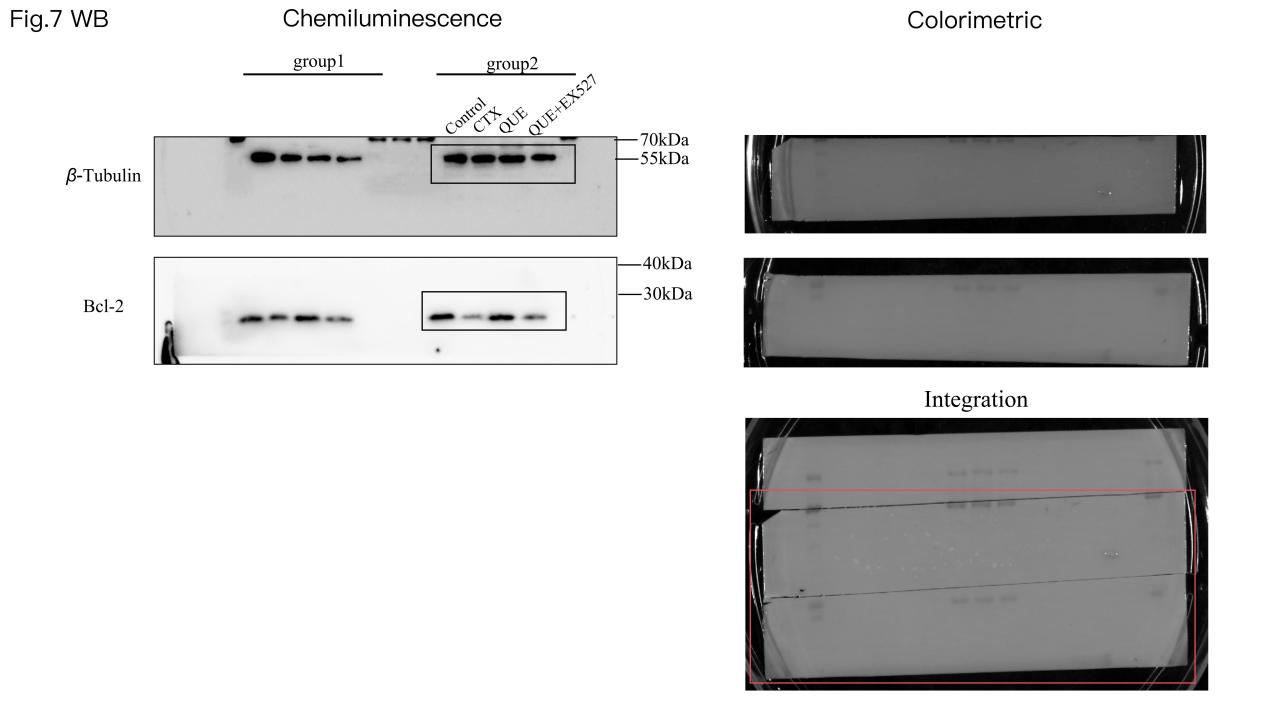

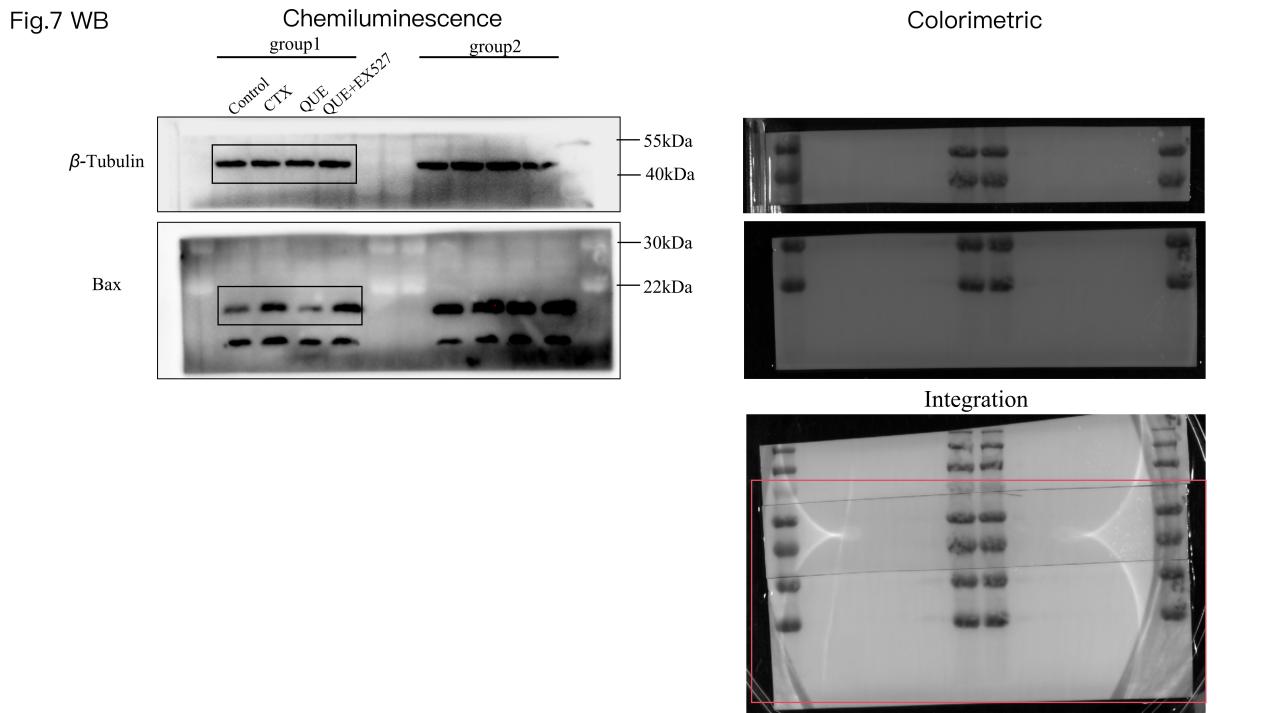


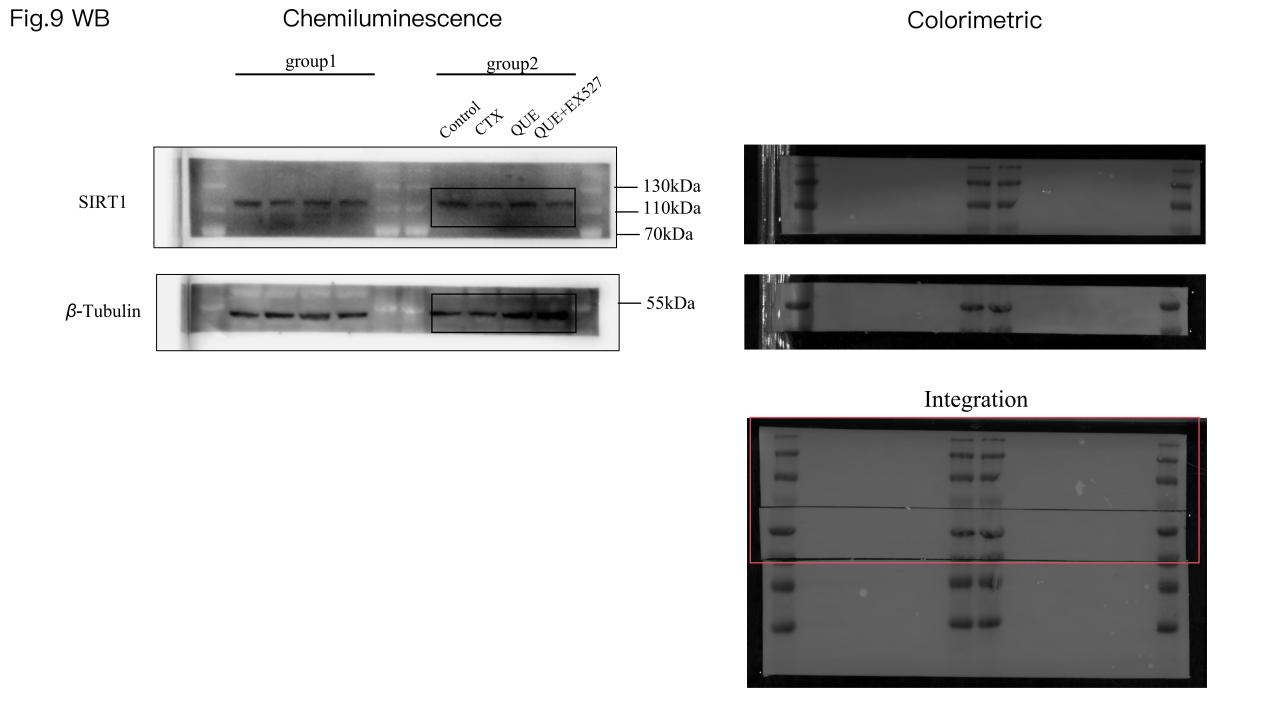

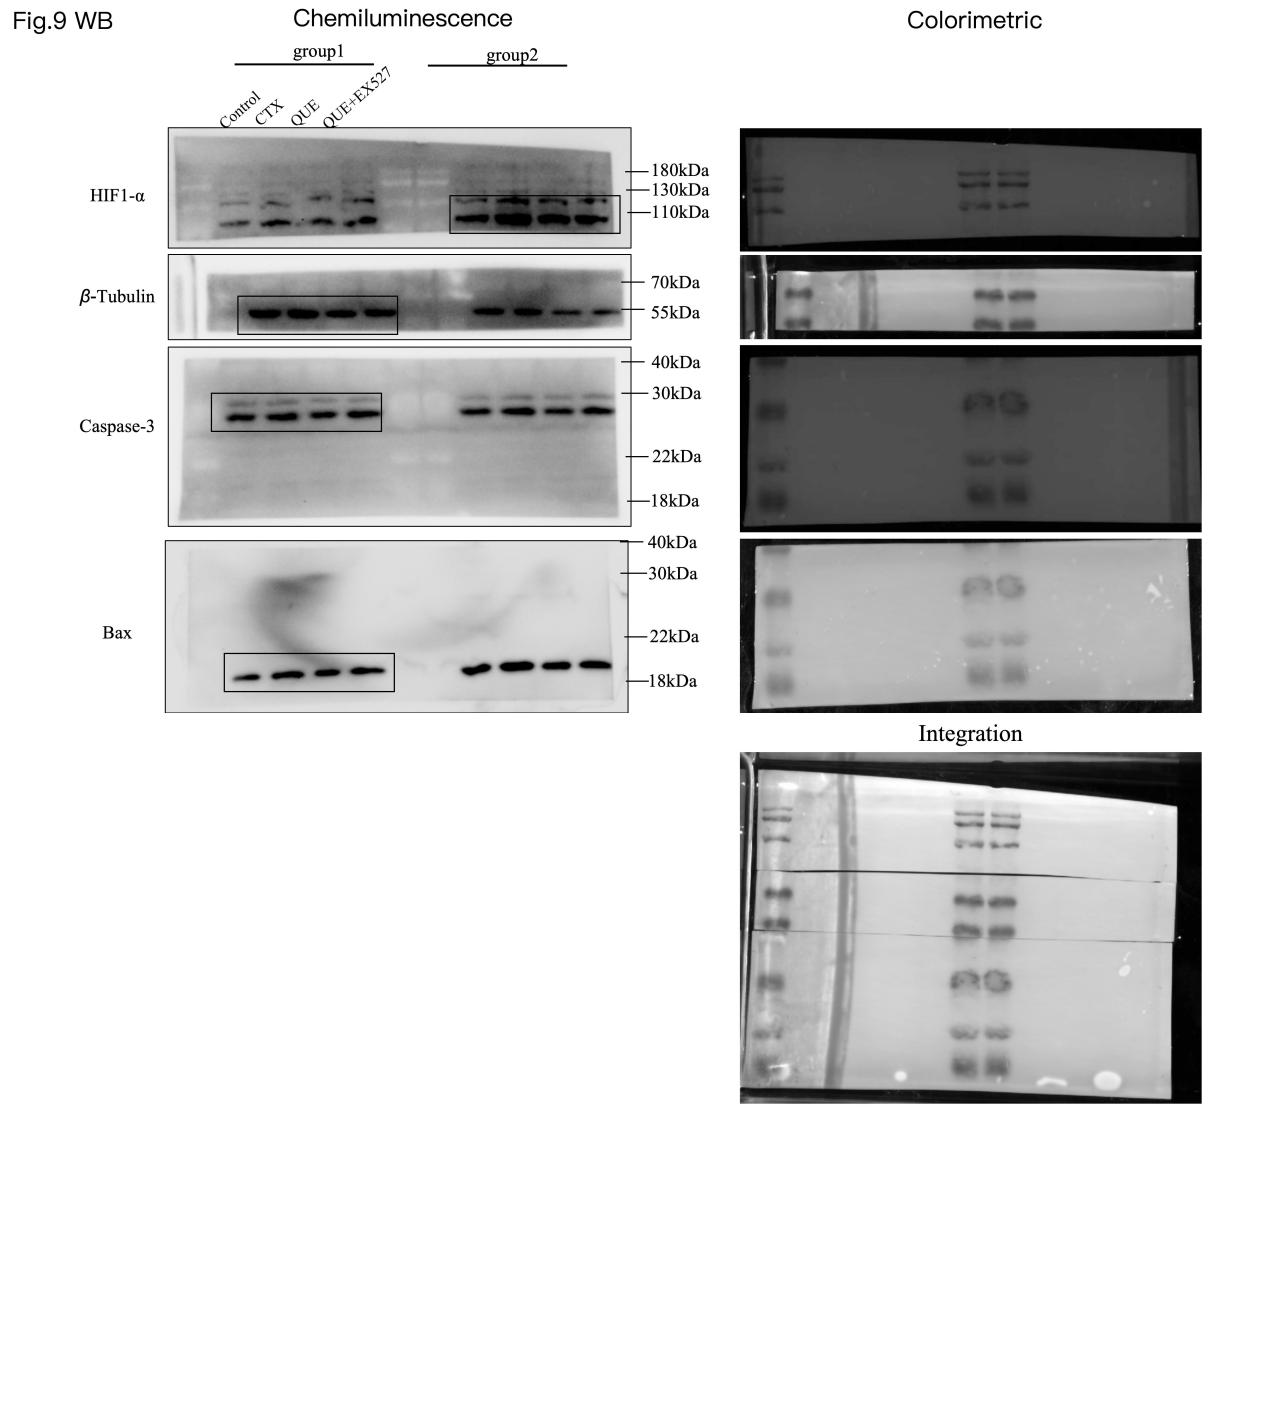


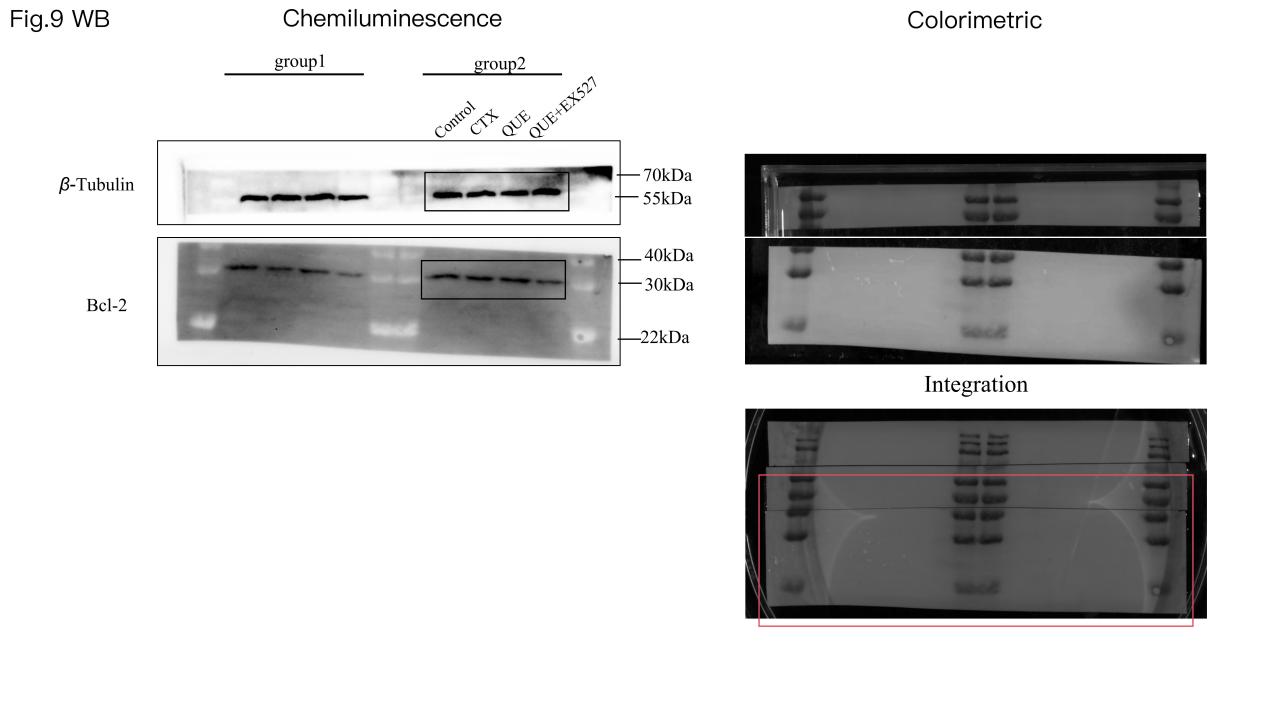

Supplement: Supplementary file 1 [file 5c07a987522b8220e64ff21e.docx]
